# Supplementary material for: Universelle Prävention kindlicher Verhaltensstörungen durch Elterntrainings
Source: Atypon-hosted journal article supplement (doi:10.1026/1616-3443/a000462), 2018-01-01
Supplement: 1616-3443_a000462_esm1.pdf [file 1616-3443_a000462_esm1.pdf]

ESM Tabelle 1

*Teilnahmeraten zum Zeitpunkt FU 5 (10-Jahres-Katamnese) für die Gesamtstichprobe (ZF I + ZF II) und die Teilstichproben ZF I (T+, T-, KG) und ZF II*

|               | Teilnahme an FU5 |             |            |             |            |
|---------------|------------------|-------------|------------|-------------|------------|
|               | ja               |             | nein       |             |            |
| Stichprobe    | n                | %           | n          | %           | n          |
| ZF I T+       | 130              | 90,3        | 14         | 9,7         | 144        |
| ZF I T-       | 40               | 95,2        | 2          | 4,8         | 42         |
| ZF I KG       | 79               | 84,0        | 15         | 9,4         | 94         |
| ZF I Gesamt   | 249              | 89,8        | 31         | 10,2        | 280        |
| ZF II         | 112              | 56,9        | 85         | 43,1        | 197        |
| <b>Gesamt</b> | <b>361</b>       | <b>75,7</b> | <b>116</b> | <b>24,3</b> | <b>477</b> |

Anmerkung: TP+ = Triple P Angebot angenommen, TP- = P-Angebot abgelehnt, KG = Kontrollgruppe
