# Supplementary material for: Universelle Prävention kindlicher Verhaltensstörungen durch Elterntrainings
Source: Atypon-hosted journal article supplement (doi:10.1026/1616-3443/a000462), 2018-01-01
Supplement: 1616-3443_a000462_esm2.pdf [file 1616-3443_a000462_esm2.pdf]

Tabelle ESM 2:

*Dropout-Analyse, Gesamtstichprobe: Zukunft Familie I und II (DFG und Jacobs-Stiftung)*

| Kriterium                          | Gesamt |       | Teilnehmer FU5 |      | Dropouts |          | Chi <sup>2</sup> -Wert | p       |        |        |        |
|------------------------------------|--------|-------|----------------|------|----------|----------|------------------------|---------|--------|--------|--------|
|                                    | n      | %     | n              | %    | n        | %        |                        |         |        |        |        |
| Alleinstehend                      |        |       |                |      |          |          | 17.797                 | .000*** |        |        |        |
| - alleinstehend                    | 129    | 27,1  | 80             | 22,2 | 49       | 42,2     |                        |         |        |        |        |
| - nicht alleinstehend              | 347    | 72,9  | 280            | 77,8 | 67       | 57,8     |                        |         |        |        |        |
| Migrationshintergrund              |        |       |                |      |          |          | 3.508                  | .061    |        |        |        |
| - mit MH                           | 102    | 21,4  | 70             | 19,4 | 32       | 27,6     |                        |         |        |        |        |
| - ohne MH                          | 375    | 78,6  | 291            | 80,6 | 84       | 72,4     |                        |         |        |        |        |
| Schulbildung Mutter                |        |       |                |      |          |          | 24.335                 | .000*** |        |        |        |
| - ohne Abschluss/<br>Hauptschule   | 92     | 19,5  | 54             | 15,1 | 38       | 33,3     |                        |         |        |        |        |
| - mittlere Reife                   | 184    | 39,0  | 137            | 38,3 | 47       | 41,2     |                        |         |        |        |        |
| - Abitur                           | 196    | 41,5  | 167            | 46,6 | 29       | 25,4     |                        |         |        |        |        |
| Schulbildung Vater                 |        |       |                |      |          |          | 29.984                 | .000*** |        |        |        |
| - ohne Abschluss/<br>Hauptschule   | 100    | 26,7  | 59             | 20,2 | 41       | 50,0     |                        |         |        |        |        |
| - mittlere Reife                   | 86     | 23,0  | 70             | 24,0 | 16       | 19,5     |                        |         |        |        |        |
| - Abitur                           | 188    | 50,3  | 163            | 55,8 | 25       | 30,5     |                        |         |        |        |        |
| Kita-Sozialstruktur-index<br>(OKS) |        |       |                |      |          |          | 49.610                 | .000*** |        |        |        |
| - unterer Status                   | 264    | 55,3  | 167            | 46,3 | 97       | 83,6     |                        |         |        |        |        |
| - mittlerer Status                 | 95     | 19,9  | 86             | 23,8 | 9        | 7,8      |                        |         |        |        |        |
| - höherer Status                   | 118    | 24,7  | 108            | 29,9 | 10       | 8,6      |                        |         |        |        |        |
| Geschlecht                         |        |       |                |      |          |          | .650                   | .420    |        |        |        |
| - Mädchen                          | 223    | 46,8  | 165            | 45,7 | 58       | 50,0     |                        |         |        |        |        |
| - Jungen                           | 254    | 53,2  | 196            | 54,3 | 58       | 50,0     |                        |         |        |        |        |
| Einkommen (DM)                     |        |       |                |      |          |          | 33.556                 | .000*** |        |        |        |
| - < 3000                           | 157    | 33,9  | 95             | 27,2 | 62       | 54,4     |                        |         |        |        |        |
| - 3000-6000                        | 212    | 45,8  | 168            | 48,1 | 44       | 38,6     |                        |         |        |        |        |
| - > 6000                           | 94     | 20,3  | 86             | 24,6 | 8        | 7,0      |                        |         |        |        |        |
|                                    | Gesamt |       | Teilnehmer FU5 |      |          | Dropouts |                        |         | T-Wert | P      |        |
|                                    | N      | M     | SD             | N    | M        | SD       | N                      | M       |        |        | SD     |
| Alter Kind prä                     | 477    | 4,2   | 1,0            | 361  | 4,2      | 1,0      | 116                    | 4,4     | 1,1    | 1.992  | .055   |
| Alter Mutter prä                   | 472    | 34,5  | 5,3            | 358  | 35,0     | 4,9      | 114                    | 33,1    | 6,1    | -2.937 | .001** |
| Alter Vater prä                    | 377    | 37,8  | 6,2            | 293  | 38,1     | 5,5      | 84                     | 36,6    | 8,1    | -1.595 | .114   |
| Anzahl Geschwister prä             | 476    | 1,0   | 0,9            | 360  | 1,0      | 0,9      | 116                    | 1,0     | 1,0    | -.454  | .650   |
| CBCL-Gesamtwert (T-Wert)           | 467    | 50,3  | 10,2           | 356  | 49,8     | 10,3     | 111                    | 51,8    | 10,1   | -1.759 | .079   |
| CBCL internal (T-Wert)             | 467    | 51,6  | 10,4           | 356  | 51,0     | 10,3     | 111                    | 53,3    | 10,7   | -1.974 | .099   |
| CBCL external (T-Wert)             | 467    | 49,8  | 9,8            | 356  | 49,4     | 9,8      | 111                    | 51,2    | 9,8    | -1.655 | .099   |
| EFB-Gesamtwert                     | 467    | 3,28  | 0,59           | 356  | 3,26     | 0,56     | 111                    | 3,33    | 0,67   | -1.271 | .204   |
| DASS-Gesamtwert                    | 467    | 24,60 | 17,60          | 356  | 6,51     | 7,03     | 111                    | 7,23    | 7,23   | -.925  | .355   |

\*p&lt;.05, \*\* p&lt;.01, \*\*\* p&lt;.001
