# Supplementary material for: Universelle Prävention kindlicher Verhaltensstörungen durch Elterntrainings
Source: Atypon-hosted journal article supplement (doi:10.1026/1616-3443/a000462), 2018-01-01
Supplement: 1616-3443_a000462_esm3.pdf [file 1616-3443_a000462_esm3.pdf]

### ESM Tabelle 3:

#### *Instrumente*

*Erziehungsfragebogen (EFB)*. Der Erziehungsfragebogen ist die deutsche Übersetzung der Parenting Scale (PS; Arnold et al., 1993; Naumann et al., 2010). In 35 Items wird elterliches Erziehungsverhalten bei problematischem Kindverhalten bipolar (effektiv vs. ineffektiv) beschrieben und das eigene Verhalten soll bezüglich der letzten zwei Monate auf einer siebenstufigen Antwortskala zwischen den beiden Verhaltensweisen eingestuft werden. Die Antworten lassen sich zu den drei Skalen *Überreagieren*, *Nachsichtigkeit* und *Weitschweifigkeit* und zu einem Gesamtwert ( $\alpha = .81(\text{Mütter})/.75(\text{Väter})$ ) zusammenfassen, wobei höhere Werte höheres dysfunktionales Erziehungsverhalten anzeigen.

*Depressions-Angst-Stress-Fragebogen (DASS)*. Der DASS (Köppe, 2001) ist die deutsche Übersetzung der „Depression-Anxiety-Stress Scale“ (Lovibond & Lovibond, 1995). Er besteht aus 42 Items, in denen verschiedene psychische Symptome beschrieben und hinsichtlich ihres Vorkommens in den letzten vier Wochen beurteilt werden sollen (1 = *nie* bis 4 = *sehr oft*). Die Antworten lassen sich zu den drei Skalen *Depressive Gestimmtheit*, *Angst* und *Stressbelastung* und einem Gesamtwert ( $\alpha = .96/.95$ ) zusammenfassen. Höhere Werte zeigen höhere Belastung an.

*Fragebogen zur Beurteilung einer Zweierbeziehung – Kurzform (FBZ-K)*. Der FBZ-K, eine deutsche Übersetzung (Köppe, 2001) der reliablen und validen „Abbreviated Dyadic Adjustment Scale“ (ADAS; Sharpley & Rogers, 1984), bildet mit sieben Items die globale Partnerschaftsqualität ab. Die Partner beurteilen drei Bereiche (z.B. Ausmaß gemeinsam verbrachter Zeit) hinsichtlich ihrer Übereinstimmung (0 = *immer uneinig* bis 5 = *immer einig*) und schätzen die Häufigkeit von drei wichtigen partnerschaftlichen Verhaltensweisen (z.B. anregender Gedankenaustausch) ein (0 = *nie* bis 5 = *öfter als einmal am Tag*). Die letzte Frage - das sogenannte Terman-Item - erfasst, wie glücklich die Partnerschaft erlebt wird (0 = *sehr unglücklich* bis 5 = *sehr glücklich*). Die Antworten werden zu einem Gesamtwert addiert ( $\alpha = .82/.82$ ). Höhere Werte zeigen höhere Partnerschaftszufriedenheit an.

*Elternfragebogen über das Verhalten von Klein- und Vorschulkindern (CBCL 1½ - 5) bzw. von Kindern und Jugendlichen (CBCL 4-16)*. Die CBCL 1½ - 5 und 4 - 18 (Döpfner et al., 2014) beschreibt in 100 (bzw. 113) Items verschiedene Verhaltensprobleme und emotionale Auffälligkeiten. Die Aussagen sollen von den Eltern hinsichtlich der Häufigkeit bzw. des Zutreffens beurteilt werden (0 = *nicht zutreffend* bis 2 = *genau / häufig zutreffend*). Die Items lassen sich neben einem Gesamtwert ( $\alpha = .94/.96$ ) zu den übergeordneten Skalen *Internalisierende Störungen* ( $\alpha = .86/.89$ ) und *Externalisierende Störungen* ( $\alpha = .90/.92$ ) zusammenfassen.

Die Konzeptionierung der Child Behavior Checklist (Achenbach, 1991) sollte es ermöglichen, über ein breites Altersspektrum (Vorschulalter bis junges Erwachsenenalter) psychische Auffälligkeiten von Kindern, Jugendlichen und jungen Erwachsenen beurteiler- und instrumentenübergreifend erfassen zu können. Im Rahmen der prospektiven Studien ZF I und ZF II wurde zu den Messzeitpunkten Prä, Post und 1-Jahres-Follow-up die Vorschulversion der CBCL 1,5 - 5 (Arbeitsgruppe Deutsche Child Behavior Checklist, 2000) eingesetzt, für die es bisher keine repräsentativen deutschen Normen gibt. Seit dem 2-Jahres-Follow-up und mit dem Übergang vom Kindergarten in die Grundschule wurde die CBCL/4-18 verwendet. Die Unterschiede zwischen beiden CBCL-Versionen sind sehr groß und beziehen sich auf *Itemanzahl und -formulierung*: Die CBCL 1,5-5 enthält 100, die CBCL 4-18 118 Items. Die Anzahl übereinstimmender Items beträgt 53. Für die übergeordneten Skalen *Internalisierende*, *Externalisierende Störungen* und *Gesamtwert* ergibt sich demzufolge eine unterschiedliche Skalenzuordnung und Itemanzahl und sie können daher nicht direkt verglichen werden.

Für diese Studie wurde folgendes Vorgehen gewählt: 1) Ermittlung von T-Werten für die Deskription der psychischen Verhaltensauffälligkeiten zu Prä und FU5. Für die CBCL 1,5 – 5 wurde auf die amerikanische Normierung (Achenbach & Rescola, 2000) zurückgegriffen, für die CBCL 4 -18 auf die Normen aus dem deutschen Handbuch (Döpfner et al., 2014). 2) Ermittlung von z-Werten pro Messzeitpunkt über die jeweilige Gesamtstichprobe, um längsschnittliche Wirksamkeitsanalysen durchzuführen.

*Fragebogen für Jugendliche (YSR)*. Der YSR (Döpfner et al., 2014) ist die deutsche Version des *Youth-Self-Report* (Achenbach, 1991) für Jugendliche im Alter zwischen 11 und 18 Jahren. In 119 Items werden per Selbsteinschätzung Verhaltensauffälligkeiten und emotionale Auffälligkeiten erfasst, die zu Problemskalen und übergeordneten Skalen zusammengefasst werden. Die übergeordnete Skala *Internalisierende Störung* setzt sich aus drei Problemskalen zusammen (*Sozialer Rückzug*, *Körperliche Beschwerden*, *Angst/Depressivität*). Die übergeordnete Skala *Externalisierende Störung* setzt sich aus den Problemskalen *Delinquentes Verhalten* und *Aggressives Verhalten* zusammen. Die internen Konsistenzen der Skalen lagen im zufriedenstellenden bis guten Bereich ( $\alpha = .61 - .89$ ). Darüber hinaus wurde die faktorielle Validität des Instrumentes weitgehend bestätigt und die Validität anhand verschiedener Kriterien belegt. Eine bundesweit repräsentative Normierung liegt vor (Döpfner et al., 2014).
