# Supplementary material for: Universelle Prävention kindlicher Verhaltensstörungen durch Elterntrainings
Source: Atypon-hosted journal article supplement (doi:10.1026/1616-3443/a000462), 2018-01-01
Supplement: 1616-3443_a000462_esm4.pdf [file 1616-3443_a000462_esm4.pdf]

ESM Tabelle 4

Mütter, nur Teilnehmerinnen an FU 5: CBCL T-Werte prä (CBCL 1,5-5) und FU5 (CBCL 4-18) für Gesamtstichprobe, Kontrollgruppe (KG), Triple P Annehmer (T+) und Triple P-Ablehner (T-)

| CBCL T-Werte | ZPKT | Gesamt (N=326) |      | KG (n=71) |      | T+ (n=219) |      | T- (n=39) |      |
|--------------|------|----------------|------|-----------|------|------------|------|-----------|------|
|              |      | M              | SD   | M         | SD   | M          | SD   | M         | SD   |
| Gesamt       | Prä  | 49,9           | 10,2 | 47,9      | 8,7  | 50,7       | 10,5 | 48,6      | 11,4 |
|              | FU 5 | 53,4           | 10,0 | 52,3      | 9,9  | 53,7       | 10,0 | 54,2      | 10,6 |
| Internal     | Prä  | 51,0           | 10,3 | 48,5      | 9,0  | 51,9       | 10,6 | 50,9      | 11,0 |
|              | FU5  | 55,0           | 9,7  | 53,6      | 9,0  | 55,2       | 9,7  | 56,4      | 10,9 |
| External     | Prä  | 49,4           | 9,8  | 47,6      | 9,1  | 50,5       | 9,9  | 46,4      | 9,8  |
|              | FU 5 | 52,8           | 10,3 | 52,3      | 10,7 | 52,9       | 10,4 | 53,2      | 9,5  |

Anmerkung: M = Mittelwert, SD = Standardabweichung
