# Supplementary material for: Universelle Prävention kindlicher Verhaltensstörungen durch Elterntrainings
Source: Atypon-hosted journal article supplement (doi:10.1026/1616-3443/a000462), 2018-01-01
Supplement: 1616-3443_a000462_esm5.pdf [file 1616-3443_a000462_esm5.pdf]

## ESM Tabelle 5

Vergleich der Fremdeinschätzung der Mütter (CBCL 4-18) und Selbstausskunft der Jugendlichen (YSR) für die Teilstichproben ZF I (n = 249) und ZF II (n = 112) und die Gesamtstichprobe ZF III (N=361) zu FU5

| Verhaltens-<br>auffälligkeiten | Eltern<br>ZF I<br>% (n) | Jugendl..<br>ZF I<br>% (n) | Eltern<br>ZF II<br>% (n) | Jugendl.<br>ZF II<br>% (n) | Eltern<br>ZF III<br>% (n) | Jugendl.<br>ZF III<br>% (n) |
|--------------------------------|-------------------------|----------------------------|--------------------------|----------------------------|---------------------------|-----------------------------|
| int. Auffällig <sup>1</sup>    | 16 (36)                 | 17 (41)                    | 21 (19)                  | 11 (12)                    | 17 (55)                   | 15 (53)                     |
| int. grenzwert. <sup>2</sup>   | 12 (27)                 | 9 (23)                     | 10 (9)                   | 14 (16)                    | 11 (22)                   | 11 (39)                     |
| ext. Auffällig <sup>3</sup>    | 12 (28)                 | 6 (14)                     | 15 (14)                  | 8 (9)                      | 13 (42)                   | 6 (23)                      |
| ext.grenzwert. <sup>4</sup>    | 12 (27)                 | 13 (31)                    | 13 (12)                  | 6 (7)                      | 12 (39)                   | 11 (38)                     |

*Anmerkungen.* CBCL = Child Behavior Checklist, YSR = Youth Self Report. <sup>1</sup>Internalisierend auffällig: CBCL- Werte ab 13 für Mädchen, 12 für Jungen. YSR-Werte ab 20 für Mädchen, ab 16 für Jungen. <sup>2</sup>Internalisierend grenzwertig: CBCL10 bis 12 für Mädchen, 8 bis 11 für Jungen. YSR: 15 bis 19 für Mädchen, 12 bis 15 für Jungen. <sup>3</sup>Externalisierend auffällig: CBCL ab 14 für Mädchen, ab 18 für Jungen. YSR: ab 20 für Mädchen, ab 22 für Jungen. <sup>4</sup> Externalisierend grenzwertig: CBCL 10 bis 13 für Mädchen, 13 bis 17 für Jungen. YSR: 16 bis 19 für Mädchen, 17 bis 21 für Jungen.
