# Supplementary material for: Universelle Prävention kindlicher Verhaltensstörungen durch Elterntrainings
Source: Atypon-hosted journal article supplement (doi:10.1026/1616-3443/a000462), 2018-01-01
Supplement: 1616-3443_a000462_esm6.pdf [file 1616-3443_a000462_esm6.pdf]

ESM Tabelle 6

Mütter: Unterschiede der Intragruppen-Effektstärken Prä zu FU5 zwischen Interventions- und Kontrollgruppe

| Variable                   | Interventionsgruppe |      |      | Kontrollgruppe |      |      | d    |
|----------------------------|---------------------|------|------|----------------|------|------|------|
|                            | n                   | M    | SD   | n              | M    | SD   |      |
| <i>CBCL 4-18 - Z-Werte</i> |                     |      |      |                |      |      |      |
| Internalisierend           | 251                 | -.04 | 1.05 | 71             | -.15 | .80  | -.11 |
| Externalisierend           | 253                 | .02  | 1.03 | 71             | -.21 | .87  | -.23 |
| <i>DASS - Gesamt</i>       | 250                 | .20  | 1.04 | 70             | .17  | .83  | -.03 |
| <i>EFB - Gesamt</i>        | 251                 | .50  | .98  | 68             | .48  | 1.08 | -.02 |
| <i>FBZ-K</i>               | 219                 | .40  | .99  | 55             | .61  | 1.05 | .21  |

Anmerkung: N = Anzahl Stichprobengröße, M = Mittelwert der Intragruppen-Effektstärke, SD = Standardabweichung der Intragruppeneffektstärke.
