# Supplementary material for: Universelle Prävention kindlicher Verhaltensstörungen durch Elterntrainings
Source: Atypon-hosted journal article supplement (doi:10.1026/1616-3443/a000462), 2018-01-01
Supplement: 1616-3443_a000462_esm7.pdf [file 1616-3443_a000462_esm7.pdf]

Tabelle 7

Väter: Unterschiede der Intragruppen-Effektstärken Prä zu FU5 zwischen Interventions- und Kontrollgruppe

| Variable                   | Interventionsgruppe |      |      | Kontrollgruppe |      |     | d   |
|----------------------------|---------------------|------|------|----------------|------|-----|-----|
|                            | n                   | M    | SD   | n              | M    | SD  |     |
| <i>CBCL 4-18 - Z-Werte</i> |                     |      |      |                |      |     |     |
| Internalisierend           | 177                 | -.12 | 1.04 | 47             | -.05 | .85 | .07 |
| Externalisierend           | 179                 | -.05 | 1.07 | 47             | .02  | .69 | .07 |
| <i>DASS - Gesamt</i>       | 178                 | .13  | 1.02 | 47             | .28  | .94 | .15 |
| <i>EFB - Gesamt</i>        | 177                 | .34  | 1.03 | 48             | .37  | .89 | .03 |
| <i>FBZ-K</i>               | 169                 | -.14 | 1.02 | 44             | -.01 | .94 | .14 |

Anmerkung: N = Anzahl Stichprobengröße, M = Mittelwert der Intragruppen-Effektstärke, SD = Standardabweichung der Intragruppeneffektstärke.
