# Supplementary material for: Universelle Prävention kindlicher Verhaltensstörungen durch Elterntrainings
Source: Atypon-hosted journal article supplement (doi:10.1026/1616-3443/a000462), 2018-01-01
Supplement: 1616-3443_a000462_esm8.pdf [file 1616-3443_a000462_esm8.pdf]

ESM Tabelle 8

Gesamtstichprobe Jugendliche: Mittelwerte (M) und Standardabweichungen (SD) sowie Inter-Gruppen-Vergleiche mit  $g_{Hedges}$  Jugendliche, absolute Werte (T+ vs. KG, T+ vs. T- und T- vs. KG)

| Variable            | T+  |      |      | T- |      |      | KG |      |     |
|---------------------|-----|------|------|----|------|------|----|------|-----|
|                     | n   | M    | SD   | n  | M    | SD   | n  | M    | SD  |
| CBCL-YSR<br>T-Werte |     |      |      |    |      |      |    |      |     |
| Internalisierend    | 241 | 54.4 | 8.7  | 40 | 55.5 | 10.1 | 77 | 53.7 | 9.3 |
| Externalisierend    | 241 | 51.6 | 7.9  | 40 | 52.2 | 6.8  | 77 | 53.3 | 8.1 |
| SDQ – Gesamt        | 241 | 9.5  | 4.52 | 40 | 9.8  | 4.37 | 77 | 9.5  | 5.0 |

| Variable         | ES                  | 95% KI      | ES   | 95% KI      | ES    | 95% KI      |
|------------------|---------------------|-------------|------|-------------|-------|-------------|
|                  | CBCL-YSR<br>T-Werte |             |      |             |       |             |
| Internalisierend | -0.08               | [-.34; .18] | 0.12 | [-.22; .45] | -0.18 | [-.56; .20] |
| Externalisierend | 0.21                | [-.05; .47] | 0.08 | [-.26; .41] | 0.14  | [-.24; .52] |
| SDQ – Gesamt     | 0.01                | [-.26; .25] | 0.08 | [-.26; .41] | -0.08 | [-.46; .31] |
| Mittelwert       | 0.05                |             | .09  |             | -.04  |             |

Anmerkung: SDQ = Strength and Difficulties Questionnaire. <sup>a</sup>p<.1, \*p<.05, \*\*p<.01, \*\*\*p<.001.
